# Supplementary material
Source: PubMed Central journal article supplement (PMC2840687)
Supplement: en.2009-0923_1.pdf [file en.2009-0923_1.pdf]

Supplemental Table 1

|         |        |                                                                                                                                                                                                                                                                                                                                                                                                                                                 |
|---------|--------|-------------------------------------------------------------------------------------------------------------------------------------------------------------------------------------------------------------------------------------------------------------------------------------------------------------------------------------------------------------------------------------------------------------------------------------------------|
| GBP1    | -5.05  | NM_002053 // GBP1 // guanylate binding protein 1, interferon-inducible, 67kDa // 1p22.2 // 2633                                                                                                                                                                                                                                                                                                                                                 |
| IFIT1   | -5.32  | NM_001548 // IFIT1 // interferon-induced protein with tetratricopeptide repeats 1 // 10q25-q26 // 3434                                                                                                                                                                                                                                                                                                                                          |
| COL14A1 | -5.36  | NM_021110 // COL14A1 // collagen, type XIV, alpha 1 (undulin) // 8q23 // 7373 // BC036192 // COL14A1 // collagen, type XIV, alpha 1 (undulin) // 8q23 // 7373 // Y11710 // COL14A1 // collagen, type XIV, alpha 1 (undulin) // 8q23 // 7373 // M64108 // COL14A1 // collagen, type XIV, alpha 1 (undulin) // 8q23 // 7373                                                                                                                       |
| C1QTNF7 | -5.96  | NM_031911 // C1QTNF7 // C1q and tumor necrosis factor related protein 7 // 4p16-p15 // 114905 // AF329839 // C1QTNF7 // C1q and tumor necrosis factor related protein 7 // 4p16-p15 // 114905                                                                                                                                                                                                                                                   |
| PTPLAD2 | -6.04  | NM_001010915 // PTPLAD2 // protein tyrosine phosphatase-like A domain containing 2 // 9p21.3 // 401494 // BC114215 // PTPLAD2 // protein tyrosine phosphatase-like A domain containing 2 // 9p21.3 // 401494 // ENST00000342195 // PTPLAD2 // protein tyrosine phosphatase-like A domain containing 2 (PTPLAD2), mRNA // 9p21.3 // 401494 // BX538052 // PTPLAD2 // protein tyrosine phosphatase-like A domain containing 2 // 9p21.3 // 401494 |
| ACTG2   | -6.05  | NM_001615 // ACTG2 // actin, gamma 2, smooth muscle, enteric // 2p13.1 // 72 // AK124338 // ACTG2 // actin, gamma 2, smooth muscle, enteric // 2p13.1 // 72                                                                                                                                                                                                                                                                                     |
| PHGDH   | -6.05  | NM_006623 // PHGDH // phosphoglycerate dehydrogenase // 1p12 // 26227 // AK093306 // PHGDH // phosphoglycerate dehydrogenase // 1p12 // 26227 // AK129762 // PHGDH // phosphoglycerate dehydrogenase // 1p12 // 26227                                                                                                                                                                                                                           |
| PLXNC1  | -6.08  | NM_005761 // PLXNC1 // plexin C1 // 12q23.3 // 10154 // AB208934 // PLXNC1 // plexin C1 // 12q23.3 // 10154                                                                                                                                                                                                                                                                                                                                     |
| SULF1   | -6.10  | NM_015170 // SULF1 // sulfatase 1 // 8q13.2-q13.3 // 23213 // BC068565 // SULF1 // sulfatase 1 // 8q13.2-q13.3 // 23213 // AK055467 // SULF1 // sulfatase 1 // 8q13.2-q13.3 // 23213                                                                                                                                                                                                                                                            |
| PSAT1   | -6.17  | NM_058179 // PSAT1 // phosphoserine aminotransferase 1 // 9q21.2 // 29968 // NM_021154 // PSAT1 // phosphoserine aminotransferase 1 // 9q21.2 // 29968                                                                                                                                                                                                                                                                                          |
| SLC38A4 | -6.40  | NM_018018 // SLC38A4 // solute carrier family 38, member 4 // 12q13 // 55089 // AK001053 // SLC38A4 // solute carrier family 38, member 4 // 12q13 // 55089                                                                                                                                                                                                                                                                                     |
| ACTA2   | -6.72  | NM_001613 // ACTA2 // actin, alpha 2, smooth muscle, aorta // 10q23.3 // 59 // BC017554 // ACTA2 // actin, alpha 2, smooth muscle, aorta // 10q23.3 // 59                                                                                                                                                                                                                                                                                       |
| SEMA3C  | -7.12  | NM_006379 // SEMA3C // sema domain, immunoglobulin domain (Ig), short basic domain, secreted, (semaphorin) 3C // 7q21-q31 // 10512                                                                                                                                                                                                                                                                                                              |
| MXRA5   | -13.86 | NM_015419 // MXRA5 // matrix-remodelling associated 5 // Xp22.33 // 25878                                                                                                                                                                                                                                                                                                                                                                       |
| TAGLN   | -15.55 | NM_001001522 // TAGLN // transgelin // 11q23.2 // 6876 // NM_003186 // TAGLN // transgelin // 11q23.2 // 6876 // BC093050 // TAGLN // transgelin // 11q23.2 // 6876 // BC065829 // TAGLN // transgelin // 11q23.2 // 6876 // AB209555 // TAGLN // transgelin // 11q23.2 // 6876 // AK223002 // TAGLN // transgelin // 11q23.2 // 6876                                                                                                           |

Table 2 Supplemental Data

List of up- and down-regulated genes in comparison of hESFendo treated with 0.5mM cAMP for 96 hrs (hESFendo cAMP) versus hESF endo treated with vehicle

| Gene symbol | FC (hESFendo cAMP/hESFendo Control) | Description                                                                                  |
|-------------|-------------------------------------|----------------------------------------------------------------------------------------------|
| CXCR4       | 33.49                               | chemokine (C-X-C motif) receptor 4                                                           |
| STC1        | 13.14                               | stanniocalcin 1                                                                              |
| PRL         | 8.82                                | prolactin                                                                                    |
| SLC16A6     | 8.43                                | solute carrier family 16, member 6 (monocarboxylic acid                                      |
| SERPINB2    | 7.45                                | serpin peptidase inhibitor, clade B (ovalbumin), member 2                                    |
| MT1A        | 7.31                                | metallothionein 1A                                                                           |
| GDF15       | 6.97                                | growth differentiation factor 15                                                             |
| TNFRSF11B   | 6.66                                | tumor necrosis factor receptor superfamily, member 11b                                       |
| MT2A        | 6.24                                | metallothionein 2A                                                                           |
| IL24        | 4.85                                | interleukin 24                                                                               |
| SHC4        | 4.73                                | SHC (Src homology 2 domain containing) family, member                                        |
| RHOB        | 4.49                                | ras homolog gene family, member B                                                            |
| MUM1L1      | 4.40                                | melanoma associated antigen (mutated) 1-like 1                                               |
| TMPRSS11E2  | 4.26                                | transmembrane protease, serine 11E2 (TMPRSS11E2),                                            |
| RGS2        | 4.24                                | regulator of G-protein signaling 2, 24kDa                                                    |
| SMOX        | 4.12                                | spermine oxidase                                                                             |
| PLCL2       | 4.08                                | phospholipase C-like 2                                                                       |
| ID3         | 4.03                                | inhibitor of DNA binding 3, dominant negative helix-loop-                                    |
| BMP2        | 3.97                                | bone morphogenetic protein 2                                                                 |
| ABCG1       | 3.65                                | ATP-binding cassette, sub-family G (WHITE), member 1                                         |
| SLC40A1     | 3.61                                | solute carrier family 40 (iron-regulated transporter),                                       |
| KIAA1754    | 3.51                                | KIAA1754                                                                                     |
| IER3        | 3.38                                | immediate early response 3                                                                   |
| MCC         | 3.37                                | mutated in colorectal cancers                                                                |
| BTG1        | 3.32                                | B-cell translocation gene 1, anti-proliferative                                              |
| ABTB2       | 3.17                                | ankyrin repeat and BTB (POZ) domain containing 2                                             |
| PPP2R1B     | 3.12                                | protein phosphatase 2 (formerly 2A), regulatory subunit A,                                   |
| TBX3        | 3.11                                | T-box 3 (ulnar mammary syndrome)                                                             |
| IGFBP1      | 3.00                                | insulin-like growth factor binding protein 1                                                 |
| SLC46A3     | 2.89                                | solute carrier family 46, member 3                                                           |
| BCL2L11     | 2.89                                | BCL2-like 11 (apoptosis facilitator)                                                         |
| TNFRSF10D   | 2.83                                | tumor necrosis factor receptor superfamily, member 10d,<br>decoy with truncated death domain |
| PRDM1       | 2.62                                | PR domain containing 1, with ZNF domain                                                      |
| TSPAN12     | 2.58                                | tetraspanin 12                                                                               |
| GAB2        | 2.56                                | GRB2-associated binding protein 2                                                            |
| GPR125      | 2.41                                | G protein-coupled receptor 125                                                               |
| DISP2       | 2.40                                | dispatched homolog 2 (Drosophila)                                                            |
| CYFIP2      | 2.34                                | cytoplasmic FMR1 interacting protein 2                                                       |
| PITPNC1     | 2.32                                | phosphatidylinositol transfer protein, cytoplasmic 1                                         |
| SNF1LK2     | 2.31                                | SNF1-like kinase 2                                                                           |
| KIAA0256    | 2.29                                | KIAA0256 gene product                                                                        |
| RNF19A      | 2.16                                | ring finger protein 19A                                                                      |
| EPHB6       | 2.15                                | EPH receptor B6                                                                              |

Table 2 Supplemental Data

List of up- and down-regulated genes in comparison of hESFendo treated with 0.5mM cAMP for 96 hrs (hESFendo cAMP) versus hESF endo treated with vehicle

|              |       |                                                                                                         |
|--------------|-------|---------------------------------------------------------------------------------------------------------|
| ARSG         | 2.13  | arylsulfatase G                                                                                         |
| ATP6V0B      | 2.09  | ATPase, H+ transporting, lysosomal 21kDa, V0 subunit b                                                  |
| C1orf75      | 2.03  | chromosome 1 open reading frame 75                                                                      |
| USP31        | 2.02  | ubiquitin specific peptidase 31                                                                         |
| FNDC3A       | 1.98  | fibronectin type III domain containing 3A                                                               |
| ARHGAP24     | 1.98  | Rho GTPase activating protein 24 /                                                                      |
| GSTO1        | 1.98  | glutathione S-transferase omega 1                                                                       |
| ZBTB38       | 1.91  | zinc finger and BTB domain containing 38                                                                |
| TNFRSF10B    | 1.91  | tumor necrosis factor receptor superfamily, member 10b                                                  |
| CLN8         | 1.90  | ceroid-lipofuscinosis, neuronal 8 (epilepsy, progressive                                                |
| OSGIN2       | 1.87  | oxidative stress induced growth inhibitor family member 2                                               |
| MAFG         | 1.86  | v-maf musculoaponeurotic fibrosarcoma oncogene                                                          |
| ZFYVE27      | 1.86  | zinc finger, FYVE domain containing 27                                                                  |
| ZNF295       | 1.85  | zinc finger protein 295                                                                                 |
| IFRD1        | 1.84  | interferon-related developmental regulator 1                                                            |
| RBM24        | 1.83  | RNA binding motif protein 24                                                                            |
| FAS          | 1.83  | Fas (TNF receptor superfamily, member 6)                                                                |
| KLHL23       | 1.82  | kelch-like 23 (Drosophila)                                                                              |
| ZNF468       | 1.80  | zinc finger protein 468                                                                                 |
| UPF3B        | 1.79  | UPF3 regulator of nonsense transcripts homolog B (yeast)                                                |
| PCK2         | 1.75  | PCK2 protein kinase 2                                                                                   |
| GADD45A      | 1.73  | growth arrest and DNA-damage-inducible, alpha                                                           |
| DDX52        | 1.72  | DEAD (Asp-Glu-Ala-Asp) box polypeptide 52                                                               |
| TMEM161B     | 1.72  | transmembrane protein 161B                                                                              |
| GABARAPL1    | 1.71  | GABA(A) receptor-associated protein like 1                                                              |
| KLHDC8B      | 1.71  | kelch domain containing 8B                                                                              |
| SLC24A6      | 1.71  | solute carrier family 24 (sodium/potassium/calcium                                                      |
| SERPINB8     | 1.69  | serpin peptidase inhibitor, clade B (ovalbumin), member 8                                               |
| ZCCHC14      | 1.69  | zinc finger, CCHC domain containing 14                                                                  |
| VPS18        | 1.69  | vacuolar protein sorting 18 homolog (S. cerevisiae)                                                     |
| GDPD1        | 1.67  | glycerophosphodiester phosphodiesterase domain                                                          |
| ACY1         | -1.78 | aminoacylase 1                                                                                          |
| COQ5         | -1.78 | coenzyme Q5 homolog, methyltransferase (S. cerevisiae)                                                  |
| CCDC111      | -1.79 | coiled-coil domain containing 111                                                                       |
| MPI          | -1.80 | mannose phosphate isomerase                                                                             |
| TRIM6-TRIM34 | -1.80 | tripartite motif-containing 34 (TRIM34), transcript variant 3,                                          |
| CAPN2        | -1.81 | calpain 2, (m/II) large subunit                                                                         |
| ARL15        | -1.82 | ADP-ribosylation factor-like 15                                                                         |
| RPL10        | -1.83 | ribosomal protein L10                                                                                   |
| SEMA5A       | -1.85 | sema domain, seven thrombospondin repeats (type 1 and type 1-like), transmembrane domain (TM) and short |
| CTA-216E10.6 | -1.86 | hypothetical FLJ23584                                                                                   |
| APOBEC3F     | -1.87 | apolipoprotein B mRNA editing enzyme, catalytic                                                         |
| THG1L        | -1.94 | tRNA-histidine guanylyltransferase 1-like (S. cerevisiae)                                               |
| FAM111A      | -1.95 | family with sequence similarity 111, member A                                                           |

Table 2 Supplemental Data

List of up- and down-regulated genes in comparison of hESFendo treated with 0.5mM cAMP for 96 hrs (hESFendo cAMP) versus hESF endo treated with vehicle

|              |       |                                                                                    |
|--------------|-------|------------------------------------------------------------------------------------|
| ADAM23       | -1.97 | ADAM metallopeptidase domain 23                                                    |
| DPH5         | -2.01 | DPH5 homolog (S. cerevisiae)                                                       |
| RFX5         | -2.04 | regulatory factor X, 5 (influences HLA class II expression)                        |
| BCL2L13      | -2.06 | BCL2-like 13 (apoptosis facilitator)                                               |
| HIST2H4A     | -2.07 | histone cluster 2, H4a                                                             |
| HIST2H2AA3   | -2.08 | histone cluster 2, H2aa3                                                           |
| ANXA3        | -2.09 | annexin A3                                                                         |
| BFSP1        | -2.10 | beaded filament structural protein 1, filensin                                     |
| IMPDH2       | -2.11 | IMP (inosine monophosphate) dehydrogenase 2                                        |
| FMO4         | -2.17 | flavin containing monooxygenase 4                                                  |
| MGAT5        | -2.18 | mannosyl (alpha-1,6-)-glycoprotein beta-1,6-N-acetyl-                              |
| CLSPN        | -2.19 | claspin homolog (Xenopus laevis)                                                   |
| HIST1H4C     | -2.20 | histone cluster 1, H4c                                                             |
| C13orf3      | -2.23 | chromosome 13 open reading frame 3                                                 |
| LOC729197    | -2.24 | similar to Dynamin-1 (D100) (Dynamin, brain) (B-dynamin)                           |
| ARHGAP11A    | -2.26 | Rho GTPase activating protein 11A                                                  |
| RPL22L1      | -2.29 | ribosomal protein L22-like 1                                                       |
| NDC80        | -2.30 | NDC80 homolog, kinetochore complex component (S.                                   |
| BRCA1        | -2.32 | breast cancer 1, early onset                                                       |
| ATAD2        | -2.38 | ATPase family, AAA domain containing 2                                             |
| SSPN         | -2.40 | sarcospan (Kras oncogene-associated gene)                                          |
| C15orf51     | -2.41 | chromosome 15 open reading frame 51                                                |
| NRP1         | -2.44 | neuropilin 1                                                                       |
| DPYSL3       | -2.45 | dihydropyrimidinase-like 3                                                         |
| LOC339803    | -2.47 | hypothetical protein LOC339803                                                     |
| KIF23        | -2.53 | kinesin family member 23                                                           |
| TPM2         | -2.55 | tropomyosin 2 (beta)                                                               |
| DKFZp434H141 | -2.58 | hypothetical protein DKFZp434H1419                                                 |
| CEP55        | -2.62 | centrosomal protein 55kDa                                                          |
| THBS3        | -2.65 | thrombospondin 3                                                                   |
| ALDH1B1      | -2.69 | aldehyde dehydrogenase 1 family, member B1                                         |
| MYL9         | -2.70 | myosin, light chain 9, regulatory                                                  |
| BRIP1        | -2.71 | BRCA1 interacting protein C-terminal helicase 1                                    |
| PDCD1LG2     | -2.76 | programmed cell death 1 ligand 2                                                   |
| KIF2C        | -2.79 | kinesin family member 2C                                                           |
| KIF11        | -2.81 | kinesin family member 11                                                           |
| RASGRP3      | -2.83 | RAS guanyl releasing protein 3 (calcium and DAG-                                   |
| FOXM1        | -2.84 | forkhead box M1                                                                    |
| AHNAK        | -2.85 | AHNAK nucleoprotein                                                                |
| BUB1         | -2.86 | BUB1 budding uninhibited by benzimidazoles 1 homolog                               |
| CASP4        | -2.87 | caspase 4, apoptosis-related cysteine peptidase                                    |
| CDKN3        | -2.88 | cyclin-dependent kinase inhibitor 3 (CDK2-associated dual specificity phosphatase) |
| FLNB         | -2.89 | filamin B, beta (actin binding protein 278)                                        |
| UBA7         | -2.97 | ubiquitin-like modifier activating enzyme 7                                        |

Table 2 Supplemental Data

List of up- and down-regulated genes in comparison of hESFendo treated with 0.5mM cAMP for 96 hrs (hESFendo cAMP) versus hESF endo treated with vehicle

|           |        |                                                                                               |
|-----------|--------|-----------------------------------------------------------------------------------------------|
| FANCI     | -3.02  | Fanconi anemia, complementation group I                                                       |
| DIAPH3    | -3.27  | diaphanous homolog 3 (Drosophila)                                                             |
| LMOD1     | -3.28  | leiomodin 1 (smooth muscle)                                                                   |
| CENPI     | -3.33  | centromere protein I                                                                          |
| SERPINE1  | -3.36  | serpin peptidase inhibitor, clade E (nexin, plasminogen activator inhibitor type 1), member 1 |
| CCNB1     | -3.45  | cyclin B1                                                                                     |
| PSMB9     | -3.46  | proteasome (prosome, macropain) subunit, beta type, 9 (large multifunctional peptidase 2)     |
| TMEM171   | -3.47  | transmembrane protein 171                                                                     |
| APOL6     | -3.47  | apolipoprotein L, 6                                                                           |
| TPX2      | -3.50  | TPX2, microtubule-associated, homolog (Xenopus laevis)                                        |
| NCAPG     | -3.85  | non-SMC condensin I complex, subunit G                                                        |
| GBP2      | -3.90  | guanylate binding protein 2, interferon-inducible                                             |
| KIF20A    | -3.90  | kinesin family member 20A                                                                     |
| CAV1      | -3.97  | caveolin 1, caveolae protein, 22kDa                                                           |
| MELK      | -4.02  | maternal embryonic leucine zipper kinase                                                      |
| ASPM      | -4.30  | asp (abnormal spindle) homolog, microcephaly associated                                       |
| GRIA1     | -4.65  | glutamate receptor, ionotropic, AMPA 1                                                        |
| HIST1H3B  | -4.69  | histone cluster 1, H3b                                                                        |
| C10orf107 | -4.81  | chromosome 10 open reading frame 107                                                          |
| S100A10   | -5.25  | S100 calcium binding protein A10                                                              |
| DLG7      | -5.53  | discs, large homolog 7 (Drosophila)                                                           |
| ANLN      | -5.76  | anillin, actin binding protein                                                                |
| SHCBP1    | -6.05  | SHC SH2-domain binding protein 1                                                              |
| ACTA2     | -6.34  | actin, alpha 2, smooth muscle, aorta                                                          |
| TOP2A     | -7.09  | topoisomerase (DNA) II alpha 170kDa                                                           |
| KIAA0101  | -7.21  | KIAA0101                                                                                      |
| TNC       | -8.15  | tenascin C (hexabrachion)                                                                     |
| TAGLN     | -11.29 | transgelin                                                                                    |

Table 3 Supplemental Data

List of up- and down-regulated genes in comparison of hESFendo treated with vehicle for 96 hrs (control) versus hESF non-endo control, expressed as fold change (FC).

| Gene symbol | FC (hESFendo Control/hESFnon-endo Control) | Description                                                 |
|-------------|--------------------------------------------|-------------------------------------------------------------|
| ANGPT2      | 4.27                                       | angiopoietin 2                                              |
| MMP10       | 3.88                                       | matrix metalloproteinase 10 (stromelysin 2)                 |
| HSD17B2     | 3.84                                       | hydroxysteroid (17-beta) dehydrogenase 2                    |
| CST1        | 3.81                                       | cystatin SN                                                 |
| MMP3        | 3.40                                       | matrix metalloproteinase 3 (stromelysin 1, progelatinase)   |
| C20orf82    | 3.34                                       | chromosome 20 open reading frame 82                         |
| MMP12       | 3.23                                       | matrix metalloproteinase 12 (macrophage elastase)           |
| PSG4        | 3.03                                       | pregnancy specific beta-1-glycoprotein 4                    |
| ABCB1       | 2.72                                       | ATP-binding cassette, sub-family B (MDR                     |
| IGFBP5      | 2.47                                       | insulin-like growth factor binding protein 5                |
| ARHGDIB     | 2.42                                       | Rho GDP dissociation inhibitor (GDI) beta                   |
| MDGA2       | 2.42                                       | MAM domain containing glycosylphosphatidylinositol anchor 2 |
| MMP1        | 2.38                                       | matrix metalloproteinase 1 (interstitial collagenase)       |
| PLCH1       | 2.35                                       | phospholipase C, eta 1                                      |
| FMO2        | 2.34                                       | flavin containing monooxygenase 2 (non-functional)          |
| GRIA4       | 2.26                                       | glutamate receptor, ionotropic, AMPA 4                      |
| ROBO2       | 2.25                                       | roundabout, axon guidance receptor, homolog 2 (Drosophila)  |
| PDE8B       | 2.25                                       | phosphodiesterase 8B                                        |
| CBLN2       | 2.24                                       | cerebellin 2 precursor                                      |
| COCH        | 2.22                                       | coagulation factor C homolog, cochlin (Limulus polyphemus)  |
| CHRM2       | 2.15                                       | cholinergic receptor, muscarinic 2                          |
| TMEM26      | 2.15                                       | transmembrane protein 26                                    |
| ABCB4       | 2.08                                       | ATP-binding cassette, sub-family B (MDR                     |
| CNTN5       | 2.05                                       | contactin 5                                                 |
| ITGA8       | 2.04                                       | integrin, alpha 8                                           |
| ZSWIM5      | 2.03                                       | zinc finger, SWIM-type containing 5                         |
| DSC3        | 2.00                                       | desmocollin 3                                               |
| SLC38A4     | 1.98                                       | solute carrier family 38, member 4                          |
| MMP27       | 1.94                                       | matrix metalloproteinase 27                                 |
| CD274       | 1.94                                       | CD274 molecule                                              |

Table 3 Supplemental Data

List of up- and down-regulated genes in comparison of hESFendo treated with vehicle for 96 hrs (control) versus hESF non-endo control, expressed as fold change (FC).

|          |      |                                                                                   |
|----------|------|-----------------------------------------------------------------------------------|
| CCDC81   | 1.93 | coiled-coil domain containing 81                                                  |
| DBC1     | 1.93 | deleted in bladder cancer 1                                                       |
| PDK4     | 1.93 | pyruvate dehydrogenase kinase, isozyme 4                                          |
| CD24     | 1.90 | CD24 molecule                                                                     |
| A2M      | 1.90 | alpha-2-macroglobulin                                                             |
| PTN      | 1.90 | pleiotrophin (heparin binding growth factor 8, neurite growth-promoting factor 1) |
| ST3GAL5  | 1.89 | ST3 beta-galactoside alpha-2,3-sialyltransferase 5                                |
| SLC16A6  | 1.87 | solute carrier family 16, member 6 (monocarboxylic acid transporter 7)            |
| KIAA0888 | 1.86 | KIAA0888 protein                                                                  |
| APCDD1   | 1.84 | adenomatosis polyposis coli down-regulated 1                                      |
| L1CAM    | 1.83 | L1 cell adhesion molecule                                                         |
| OSAP     | 1.82 | ovary-specific acidic protein                                                     |
| MMP7     | 1.81 | matrix metalloproteinase 7 (matrilysin, uterine)                                  |
| SYTL5    | 1.81 | synaptotagmin-like 5                                                              |
| MYCN     | 1.81 | v-myc myelocytomatosis viral related oncogene, neuroblastoma derived (avian)      |
| C17orf28 | 1.80 | chromosome 17 open reading frame 28                                               |
| C18orf58 | 1.78 | chromosome 18 open reading frame 58                                               |
| GRAMD1C  | 1.78 | GRAM domain containing 1C                                                         |
| CCRL1    | 1.77 | chemokine (C-C motif) receptor-like 1                                             |
| PFKFB3   | 1.77 | 6-phosphofructo-2-kinase                                                          |
| AK5      | 1.75 | adenylate kinase 5                                                                |
| GSTM5    | 1.74 | glutathione S-transferase M5                                                      |
| PHKA1    | 1.74 | phosphorylase kinase, alpha 1 (muscle)                                            |
| NRK      | 1.74 | Nik related kinase                                                                |
| DEPDC1   | 1.72 | DEP domain containing 1                                                           |
| DSG2     | 1.72 | desmoglein 2                                                                      |
| POLR2J3  | 1.72 | RPB11b2 protein                                                                   |
| PSG7     | 1.72 | pregnancy specific beta-1-glycoprotein 7                                          |
| MGC35361 | 1.71 | hypothetical MGC35361                                                             |
| BMP4     | 1.70 | bone morphogenetic protein 4                                                      |
| DOCK4    | 1.70 | dedicator of cytokinesis 4                                                        |
| TRPC6    | 1.69 | transient receptor potential cation channel, subfamily C, member 6                |

Table 3 Supplemental Data

List of up- and down-regulated genes in comparison of hESFendo treated with vehicle for 96 hrs (control) versus hESF non-endo control, expressed as fold change (FC).

|           |      |                                                                                 |
|-----------|------|---------------------------------------------------------------------------------|
| CCND2     | 1.68 | cyclin D2                                                                       |
| ESCO2     | 1.67 | establishment of cohesion 1 homolog 2 ( <i>S. cerevisiae</i> )                  |
| HIST1H4F  | 1.67 | histone cluster 1, H4f                                                          |
| APOD      | 1.66 | apolipoprotein D                                                                |
| KRTAP1-5  | 1.66 | keratin associated protein 1-5                                                  |
| KRTAP1-5  | 1.66 | keratin associated protein 1-5                                                  |
| MEOX1     | 1.66 | mesenchyme homeobox 1                                                           |
| C10orf107 | 1.65 | chromosome 10 open reading frame 107                                            |
| DLG7      | 1.64 | discs, large homolog 7 ( <i>Drosophila</i> )                                    |
| MGAT5     | 1.63 | mannosyl (alpha-1,6-)-glycoprotein beta-1,6-N-acetyl-glucosaminyltransferase    |
| ATP1B1    | 1.62 | ATPase, Na <sup>+</sup>                                                         |
| KRT34     | 1.62 | keratin 34                                                                      |
| NUSAP1    | 1.62 | nucleolar and spindle associated protein 1                                      |
| COP1      | 1.62 | caspase-1 dominant-negative inhibitor pseudo-ICE                                |
| SEMA6A    | 1.61 | sema domain, transmembrane domain (TM), and cytoplasmic domain, (semaphorin) 6A |
| SPRY4     | 1.61 | sprouty homolog 4 ( <i>Drosophila</i> )                                         |
| TSPAN13   | 1.61 | tetraspanin 13                                                                  |
| CCDC144A  | 1.61 | coiled-coil domain containing 144A                                              |
| DUSP6     | 1.61 | dual specificity phosphatase 6                                                  |
| KIF5C     | 1.60 | kinesin family member 5C                                                        |
| CNIH3     | 1.60 | cornichon homolog 3 ( <i>Drosophila</i> )                                       |
| SEMA3A    | 1.60 | 3A                                                                              |
| NEDD4L    | 1.60 | neural precursor cell expressed, developmentally down-regulated 4-like          |
| ITGB3     | 1.59 | integrin, beta 3 (platelet glycoprotein IIIa, antigen CD61)                     |
| HIST1H1A  | 1.59 | histone cluster 1, H1a                                                          |
| CCDC144A  | 1.58 | coiled-coil domain containing 144A                                              |
| ZDHHC15   | 1.58 | zinc finger, DHHC-type containing 15                                            |
| CPE       | 1.58 | carboxypeptidase E                                                              |
| KLHL2     | 1.57 | kelch-like 2, Mayven ( <i>Drosophila</i> )                                      |
| TNFSF4    | 1.57 | glycoprotein 1, 34kDa)                                                          |
| LEPREL1   | 1.56 | leprecan-like 1                                                                 |
| ZNF724P   | 1.56 | zinc finger protein 724 pseudogene                                              |



Table 3 Supplemental Data

List of up- and down-regulated genes in comparison of hESFendo treated with vehicle for 96 hrs (control) versus hESF non-endo control, expressed as fold change (FC).

|          |       |                                                                                |
|----------|-------|--------------------------------------------------------------------------------|
| LIPN     | 1.56  | lipase, family member N                                                        |
| GLRX     | 1.56  | glutaredoxin (thioltransferase)                                                |
| FAM111B  | 1.56  | family with sequence similarity 111, member B                                  |
| ASTN2    | 1.55  | astrotactin 2                                                                  |
| IGFBP7   | 1.54  | insulin-like growth factor binding protein 7                                   |
| TNFRSF19 | 1.51  | tumor necrosis factor receptor superfamily, member 19                          |
| DTL      | 1.46  | denticleless homolog (Drosophila)                                              |
| AOX1     | -1.45 | aldehyde oxidase 1                                                             |
| MATN2    | -1.52 | matrilin 2                                                                     |
| CSF1     | -1.54 | colony stimulating factor 1 (macrophage)                                       |
| OR2J3    | -1.55 | olfactory receptor, family 2, subfamily J, member 3                            |
| DDIT4    | -1.55 | DNA-damage-inducible transcript 4                                              |
| C9orf19  | -1.56 | chromosome 9 open reading frame 19                                             |
| METTL7A  | -1.60 | methyltransferase like 7A                                                      |
| PIP5K1B  | -1.60 | phosphatidylinositol-4-phosphate 5-kinase, type I, beta                        |
| FAM49A   | -1.61 | family with sequence similarity 49, member A                                   |
| NAV2     | -1.61 | neuron navigator 2                                                             |
| SLC7A8   | -1.61 | solute carrier family 7 (cationic amino acid transporter, y+ system), member 8 |
| 9-Sep    | -1.62 | septin 9                                                                       |
| FMOD     | -1.62 | fibromodulin                                                                   |
| LONRF2   | -1.62 | LON peptidase N-terminal domain and ring finger 2                              |
| C6orf141 | -1.63 | chromosome 6 open reading frame 141                                            |
| DMKN     | -1.64 | dermokine                                                                      |
| ANKRD30B | -1.64 | ankyrin repeat domain 30B                                                      |
| GEM      | -1.64 | GTP binding protein overexpressed in skeletal muscle                           |
| BNC1     | -1.64 | basonuclin 1                                                                   |
| CD226    | -1.65 | CD226 molecule                                                                 |
| IGF1     | -1.65 | insulin-like growth factor 1 (somatomedin C)                                   |
| TNC      | -1.65 | tenascin C (hexabrachion)                                                      |
| LIFR     | -1.65 | leukemia inhibitory factor receptor alpha                                      |
| PPAP2B   | -1.68 | phosphatidic acid phosphatase type 2B                                          |
| AKR1C3   | -1.69 | II)                                                                            |

Table 3 Supplemental Data

List of up- and down-regulated genes in comparison of hESFendo treated with vehicle for 96 hrs (control) versus hESF non-endo control, expressed as fold change (FC).

|          |       |                                                                                |
|----------|-------|--------------------------------------------------------------------------------|
| EGR1     | -1.69 | early growth response 1                                                        |
| SERPINE2 | -1.70 | member 2                                                                       |
| BHLHB3   | -1.70 | basic helix-loop-helix domain containing, class B, 3                           |
| ABCC9    | -1.70 | ATP-binding cassette, sub-family C (CFTR                                       |
| TMEM16D  | -1.70 | transmembrane protein 16D                                                      |
| THSD7A   | -1.70 | thrombospondin, type I, domain containing 7A                                   |
| TLL1     | -1.71 | tolloid-like 1                                                                 |
| IL19     | -1.71 | interleukin 19                                                                 |
| PRKAR2B  | -1.71 | protein kinase, cAMP-dependent, regulatory, type II, beta                      |
| MKX      | -1.71 | mohawk homeobox                                                                |
| SLC7A3   | -1.71 | solute carrier family 7 (cationic amino acid transporter, y+ system), member 3 |
| RORB     | -1.72 | RAR-related orphan receptor B                                                  |
| IL17RD   | -1.73 | interleukin 17 receptor D                                                      |
| CLIC2    | -1.73 | chloride intracellular channel 2                                               |
| LRRC2    | -1.73 | leucine rich repeat containing 2                                               |
| NFIX     | -1.73 | nuclear factor I                                                               |
| RHOJ     | -1.73 | ras homolog gene family, member J                                              |
| ID2      | -1.73 | inhibitor of DNA binding 2, dominant negative helix-loop-helix protein         |
| CHI3L1   | -1.74 | chitinase 3-like 1 (cartilage glycoprotein-39)                                 |
| PODN     | -1.74 | podocan                                                                        |
| IL1R1    | -1.75 | interleukin 1 receptor, type I                                                 |
| DACH1    | -1.75 | dachshund homolog 1 (Drosophila)                                               |
| STK17B   | -1.75 | serine                                                                         |
| TNIK     | -1.75 | TRAF2 and NCK interacting kinase                                               |
| ECM2     | -1.76 | extracellular matrix protein 2, female organ and adipocyte specific            |
| LRRK2    | -1.76 | leucine-rich repeat kinase 2                                                   |
| HSPB6    | -1.79 | heat shock protein, alpha-crystallin-related, B6                               |
| ATP8B4   | -1.80 | ATPase, class I, type 8B, member 4                                             |
| LRRC32   | -1.80 | leucine rich repeat containing 32                                              |
| PMP22    | -1.82 | peripheral myelin protein 22                                                   |
| SERPINF1 | -1.83 | factor), member 1                                                              |
| MFAP5    | -1.83 | microfibrillar associated protein 5                                            |

Table 3 Supplemental Data

List of up- and down-regulated genes in comparison of hESFendo treated with vehicle for 96 hrs (control) versus hESF non-endo control, expressed as fold change (FC).

|          |       |                                                                                  |
|----------|-------|----------------------------------------------------------------------------------|
| C13orf33 | -1.84 | chromosome 13 open reading frame 33                                              |
| KCNE4    | -1.84 | potassium voltage-gated channel, Isk-related family, member 4                    |
| FOS      | -1.85 | v-fos FBJ murine osteosarcoma viral oncogene homolog                             |
| PGM5     | -1.85 | phosphoglucomutase 5                                                             |
| HECW1    | -1.85 | HECT, C2 and WW domain containing E3 ubiquitin protein ligase 1                  |
| THBS2    | -1.86 | thrombospondin 2                                                                 |
| AKR1C2   | -1.87 | aldo-keto reductase family 1, member C2 (dihydrodiol dehydrogenase 2)            |
| SGK1     | -1.87 | serum                                                                            |
| KLHL13   | -1.87 | kelch-like 13 (Drosophila)                                                       |
| ZDHHC14  | -1.88 | zinc finger, DHHC-type containing 14                                             |
| INHBA    | -1.89 | inhibin, beta A                                                                  |
| FBN2     | -1.89 | fibrillin 2 (congenital contractural arachnodactyly)                             |
| PAK3     | -1.89 | p21 (CDKN1A)-activated kinase 3                                                  |
| EMX2     | -1.89 | empty spiracles homeobox 2                                                       |
| LAMA4    | -1.89 | laminin, alpha 4                                                                 |
| PCDH10   | -1.91 | protocadherin 10                                                                 |
| CDH2     | -1.92 | cadherin 2, type 1, N-cadherin (neuronal)                                        |
| DPP4     | -1.92 | dipeptidyl-peptidase 4 (CD26, adenosine deaminase complexing protein 2)          |
| DLX5     | -1.93 | distal-less homeobox 5                                                           |
| SEMA6D   | -1.94 | sema domain, transmembrane domain (TM), and cytoplasmic domain, (semaphorin) 6D  |
| KCNJ2    | -1.96 | potassium inwardly-rectifying channel, subfamily J, member 2                     |
| CPM      | -1.96 | carboxypeptidase M                                                               |
| TGFB3    | -1.96 | transforming growth factor, beta 3                                               |
| VLDLR    | -1.99 | very low density lipoprotein receptor                                            |
| MCOLN3   | -1.99 | mucolipin 3                                                                      |
| IL33     | -2.00 | interleukin 33                                                                   |
| RDH10    | -2.00 | retinol dehydrogenase 10 (all-trans)                                             |
| ABCA6    | -2.00 | ATP-binding cassette, sub-family A (ABC1), member 6                              |
| FAM20A   | -2.03 | family with sequence similarity 20, member A                                     |
| ANK2     | -2.03 | ankyrin 2, neuronal                                                              |
| EDG2     | -2.04 | endothelial differentiation, lysophosphatidic acid G-protein-coupled receptor, 2 |
| EDNRA    | -2.05 | endothelin receptor type A                                                       |

Table 3 Supplemental Data

List of up- and down-regulated genes in comparison of hESFendo treated with vehicle for 96 hrs (control) versus hESF non-endo control, expressed as fold change (FC).

|         |       |                                                                     |
|---------|-------|---------------------------------------------------------------------|
| TSHZ3   | -2.07 | teashirt zinc finger homeobox 3                                     |
| ST6GAL2 | -2.08 | ST6 beta-galactosamide alpha-2,6-sialyltransferase 2                |
| ROR2    | -2.08 | receptor tyrosine kinase-like orphan receptor 2                     |
| SFRP4   | -2.10 | secreted frizzled-related protein 4                                 |
| FIBIN   | -2.10 | fin bud initiation factor                                           |
| CNTN3   | -2.11 | contactin 3 (plasmacytoma associated)                               |
| KDR     | -2.12 | kinase insert domain receptor (a type III receptor tyrosine kinase) |
| HGF     | -2.14 | hepatocyte growth factor (hepapoietin A)                            |
| TNFAIP6 | -2.14 | tumor necrosis factor, alpha-induced protein 6                      |
| CXCL12  | -2.17 | chemokine (C-X-C motif) ligand 12 (stromal cell-derived factor 1)   |
| CDH11   | -2.17 | cadherin 11, type 2, OB-cadherin (osteoblast)                       |
| PDE1A   | -2.18 | phosphodiesterase 1A, calmodulin-dependent                          |
| EBF1    | -2.22 | early B-cell factor 1                                               |
| IFI44L  | -2.23 | interferon-induced protein 44-like                                  |
| POSTN   | -2.26 | periostin, osteoblast specific factor                               |
| CCDC80  | -2.29 | coiled-coil domain containing 80                                    |
| FST     | -2.32 | follistatin                                                         |
| ABCA9   | -2.34 | ATP-binding cassette, sub-family A (ABC1), member 9                 |
| MFAP4   | -2.35 | microfibrillar-associated protein 4                                 |
| SMPDL3A | -2.38 | sphingomyelin phosphodiesterase, acid-like 3A                       |
| RSPO3   | -2.38 | R-spondin 3 homolog ( <i>Xenopus laevis</i> )                       |
| CLDN11  | -2.39 | claudin 11 (oligodendrocyte transmembrane protein)                  |
| KCNK2   | -2.40 | potassium channel, subfamily K, member 2                            |
| SNCA    | -2.42 | synuclein, alpha (non A4 component of amyloid precursor)            |
| CYP1B1  | -2.43 | cytochrome P450, family 1, subfamily B, polypeptide 1               |
| PRSS12  | -2.45 | protease, serine, 12 (neurotrypsin, motopsin)                       |
| IGFBP3  | -2.45 | insulin-like growth factor binding protein 3                        |
| PSAT1   | -2.46 | phosphoserine aminotransferase 1                                    |
| RXFP1   | -2.46 | relaxin                                                             |
| CHODL   | -2.48 | chondrolectin                                                       |
| SLIT2   | -2.53 | slit homolog 2 ( <i>Drosophila</i> )                                |
| ASPN    | -2.55 | asporin                                                             |

Table 3 Supplemental Data

List of up- and down-regulated genes in comparison of hESFendo treated with vehicle for 96 hrs (control) versus hESF non-endo control, expressed as fold change (FC).

|         |       |                                                                                  |
|---------|-------|----------------------------------------------------------------------------------|
| FLRT2   | -2.61 | fibronectin leucine rich transmembrane protein 2                                 |
| KGFLP1  | -2.62 | keratinocyte growth factor-like protein 1                                        |
| KGFLP1  | -2.62 | keratinocyte growth factor-like protein 1                                        |
| KGFLP1  | -2.62 | keratinocyte growth factor-like protein 1                                        |
| NOX4    | -2.64 | NADPH oxidase 4                                                                  |
| SLC7A14 | -2.64 | solute carrier family 7 (cationic amino acid transporter, y+ system), member 14  |
| ALDH1A1 | -2.66 | aldehyde dehydrogenase 1 family, member A1                                       |
| TMOD1   | -2.68 | tropomodulin 1                                                                   |
| ALDH1A2 | -2.69 | aldehyde dehydrogenase 1 family, member A2 (ALDH1A2), transcript variant 3, mRNA |
| ERAP2   | -2.81 | endoplasmic reticulum aminopeptidase 2                                           |
| ITGBL1  | -2.85 | integrin, beta-like 1 (with EGF-like repeat domains)                             |
| LTBP1   | -2.93 | latent transforming growth factor beta binding protein 1                         |
| PRLR    | -2.93 | prolactin receptor                                                               |
| ODZ3    | -2.93 | odz, odd Oz                                                                      |
| ADAM12  | -3.00 | ADAM metallopeptidase domain 12 (meltrin alpha)                                  |
| SFRP1   | -3.07 | secreted frizzled-related protein 1                                              |
| FGF7    | -3.28 | fibroblast growth factor 7 (keratinocyte growth factor)                          |
| DKK1    | -3.28 | dickkopf homolog 1 (Xenopus laevis)                                              |
| SILV    | -3.50 | silver homolog (mouse)                                                           |
| SEMA3C  | -3.57 | 3C                                                                               |
| CCL2    | -4.02 | chemokine (C-C motif) ligand 2                                                   |
| PLXNC1  | -4.19 | plexin C1                                                                        |
| TFPI2   | -6.87 | tissue factor pathway inhibitor 2                                                |

## Supplemental Table 4

Ingenuity Canonical Pathways hESFnon-endo cAMP vs. hESFnon-endo vehicle control

| Pathways                                            | -Log(P-value) | p-value | Molecules                                                                                                     |
|-----------------------------------------------------|---------------|---------|---------------------------------------------------------------------------------------------------------------|
| Hepatic Fibrosis / Hepatic Stellate Cell Activation | 3.87E00       | 0.00013 | VEGFA, MYL9 (includes EG:10398), IGFBP4, MYH10, FN1, EDNRB, ACTA2, KDR, TGFB2, EDNRA, IL1R1, TNFRSF11B        |
| Cell Cycle: G2/M DNA Damage Checkpoint Regulation   | 2.43E00       | 0.00372 | CCNB1, GADD45A, TOP2A, CCNB2, CDC2                                                                            |
| Caveolar-mediated Endocytosis                       | 2.34E00       | 0.00457 | FLNB, FLNC, FLNA, ACTA2, CAV1, ACTG2 (includes EG:72), PTRF                                                   |
| cAMP-mediated Signaling                             | 2.1E00        | 0.00794 | AKAP12, RGS2, PDE7B, PDE3B, DUSP1, RGS10, DUSP4, PDE8B, ADRA2C, PDE4B                                         |
| G-Protein Coupled Receptor Signaling                | 1.88E00       | 0.01318 | RGS2, PDE7B, EDNRB, PDE3B, DUSP1, RGS10, EDNRA, DUSP4, PDE8B, ADRA2C, PDE4B                                   |
| Sphingolipid Metabolism                             | 1.68E00       | 0.02089 | SULF1, PPAP2A, ARSG, SPHK1, SGMS2                                                                             |
| VEGF Signaling                                      | 1.66E00       | 0.02188 | VEGFA, FOXO1, ACTA2, KDR, HIF1A, ACTG2 (includes EG:72)                                                       |
| Tight Junction Signaling                            | 1.65E00       | 0.02239 | MYLK, MYL9 (includes EG:10398), MYH10, ACTA2, JAM2, TGFB2, ACTG2 (includes EG:72), PPP2R1B, TNFRSF11B         |
| Nicotinate and Nicotinamide Metabolism              | 1.47E00       | 0.03388 | NP, CDK6, NAMPT, AOX1, CDC2, BST1                                                                             |
| IL-8 Signaling                                      | 1.45E00       | 0.03548 | VEGFA, ANGPT1, RHOB, KDR, RHOJ, PTGS2, CCND1, TEK, PLD1                                                       |
| Cardiac $\beta$ -adrenergic Signaling               | 1.43E00       | 0.03715 | AKAP12, PDE7B, PDE3B, PDE8B, PDE4B, SLC8A1, PPP2R1B                                                           |
| Aminosugars Metabolism                              | 1.32E00       | 0.04786 | PDE7B, PDE3B, PDE8B, PDE4B                                                                                    |
| VDR/RXR Activation                                  | 1.25E00       | 0.05623 | FOXO1, GADD45A, IL1RL1, TGFB2, HES1                                                                           |
| Coagulation System                                  | 1.17E00       | 0.06761 | PLAUR, SERPINE1, BDKRB1                                                                                       |
| Aryl Hydrocarbon Receptor Signaling                 | 1.14E00       | 0.07244 | CCNA2, NFIX, ALDH1L2, CDK6, TGFB2, CCND1, GSTO1                                                               |
| TR/RXR Activation                                   | 1.14E00       | 0.07244 | AKR1C3, SLC2A1, PDE3B, RCAN2, HIF1A                                                                           |
| Regulation of Actin-based Motility by Rho           | 1.14E00       | 0.07244 | MYLK, RHOB, ACTA2, RHOJ, ACTG2 (includes EG:72)                                                               |
| Acute Phase Response Signaling                      | 1.11E00       | 0.07762 | SOCS3, SOD2, FN1, C4A, IL1R1, MAP3K5 (includes EG:4217), SERPINE1, TNFRSF11B                                  |
| Notch Signaling                                     | 1.09E00       | 0.08128 | CNTN1, MAML3, HES1                                                                                            |
| Endoplasmic Reticulum Stress Pathway                | 1.08E00       | 0.08318 | ERN1 (includes EG:2081), MAP3K5 (includes EG:4217)                                                            |
| Calcium Signaling                                   | 1.08E00       | 0.08318 | MYL9 (includes EG:10398), MYH10, GRIA1, ACTA2, RCAN2, TPM2, SLC8A1, ATP2B4                                    |
| Lysine Degradation                                  | 1.01E00       | 0.09772 | ACAT2, AASS, REN, KYNU                                                                                        |
| Glycine, Serine and Threonine Metabolism            | 9.93E-01      | 0.10162 | PSAT1, PHGDH, SMOX, PLCL2                                                                                     |
| C21-Steroid Hormone Metabolism                      | 9.31E-01      | 0.11722 | AKR1C3, HSD11B1                                                                                               |
| Nitric Oxide Signaling in the Cardiovascular System | 8.91E-01      | 0.12853 | VEGFA, PDE3B, KDR, CAV1                                                                                       |
| LPS/IL-1 Mediated Inhibition of RXR Function        | 8.6E-01       | 0.13804 | FABP5, FMO2, ALDH1L2, ABCG1, SMOX, IL1R1, GSTO1, TNFRSF11B                                                    |
| BMP signaling pathway                               | 8.6E-01       | 0.13804 | FST, BMP3, BMP2, NOG                                                                                          |
| Tryptophan Metabolism                               | 8.48E-01      | 0.14191 | WARS, ACAT2, DHCR24, SMOX, AOX1, KYNU                                                                         |
| TGF- $\beta$ Signaling                              | 8.15E-01      | 0.15311 | BMP2, TGFB2, SERPINE1, INHBA                                                                                  |
| Phospholipid Degradation                            | 8.01E-01      | 0.15812 | PPAP2A, SPHK1, PLCL2, PLD1                                                                                    |
| Axonal Guidance Signaling                           | 7.85E-01      | 0.16406 | PLXNC1, CXCR4, BMP3, BMP2, SEMA6A, SLIT2, VEGFA, MYL9 (includes EG:10398), EPHB6, SEMA3D, SEMA3C, NRP1, FZD7  |
| Actin Cytoskeleton Signaling                        | 7.65E-01      | 0.17179 | MYLK, MYL9 (includes EG:10398), MYH10, FN1, CYFIP2 (includes EG:26999), DIAPH3, ACTA2, ACTG2 (includes EG:72) |
| Interferon Signaling                                | 7.61E-01      | 0.17338 | IFIT1, IFIT3                                                                                                  |

## Supplemental Table 4

Ingenuity Canonical Pathways hESFnon-endo cAMP vs. hESFnon-endo vehicle control

|                                                                 |          |         |                                                                             |
|-----------------------------------------------------------------|----------|---------|-----------------------------------------------------------------------------|
| Glycerophospholipid Metabolism                                  | 7.46E-01 | 0.17947 | PPAP2A, GPD2, SPHK1, PLCL2, PLD1                                            |
| Sonic Hedgehog Signaling                                        | 7.38E-01 | 0.18281 | CCNB1, CDC2                                                                 |
| Cell Cycle: G1/S Checkpoint Regulation                          | 7.35E-01 | 0.18408 | CDK6, TGFB2, CCND1                                                          |
| PI3K/AKT Signaling                                              | 7.25E-01 | 0.18836 | GAB2, FOXO1, MAP3K5 (includes EG:4217), CCND1, PPP2R1B                      |
| p53 Signaling                                                   | 6.85E-01 | 0.20654 | GADD45A, GADD45G, TNFRSF10B, CCND1                                          |
| Lysine Biosynthesis                                             | 6.62E-01 | 0.21777 | AASS                                                                        |
| Amyotrophic Lateral Sclerosis Signaling                         | 6.62E-01 | 0.21777 | VEGFA, GRIA1, CAPN2, RNF19A                                                 |
| Phenylalanine Metabolism                                        | 6.53E-01 | 0.22233 | DHCR24, SMOX                                                                |
| Purine Metabolism                                               | 6.33E-01 | 0.23281 | AK5, ATP6V0B, IMPDH2, PDE7B, PDE3B, NP, RRM2, PDE8B, PDE4B, AOX1            |
| p38 MAPK Signaling                                              | 6.18E-01 | 0.24099 | DUSP1, TGFB2, IL1R1, MAP3K5 (includes EG:4217)                              |
| Fcy Receptor-mediated Phagocytosis in Macrophages and Monocytes | 6.08E-01 | 0.24660 | GAB2, ACTA2, ACTG2 (includes EG:72), PLD1                                   |
| Integrin Signaling                                              | 5.93E-01 | 0.25527 | MYLK, RHOB, ACTA2, CAV1, RHOJ, CAPN2, ACTG2 (includes EG:72)                |
| LXR/RXR Activation                                              | 5.58E-01 | 0.27669 | ABCG1, IL1R1, TNFRSF11B                                                     |
| Synthesis and Degradation of Ketone Bodies                      | 5.54E-01 | 0.27925 | ACAT2                                                                       |
| Aminoacyl-tRNA Biosynthesis                                     | 5.34E-01 | 0.29242 | WARS, IARS                                                                  |
| NRF2-mediated Oxidative Stress Response                         | 5.05E-01 | 0.31261 | SOD2, ACTA2, MAP3K5 (includes EG:4217), AOX1, ACTG2 (includes EG:72), GSTO1 |
| Valine, Leucine and Isoleucine Biosynthesis                     | 4.98E-01 | 0.31769 | IARS                                                                        |
| Ceramide Signaling                                              | 4.84E-01 | 0.32810 | SPHK1, PPP2R1B, TNFRSF11B                                                   |
| Androgen and Estrogen Metabolism                                | 4.46E-01 | 0.35810 | SULF1, ARSG, HSD11B1                                                        |
| Leukocyte Extravasation Signaling                               | 4.31E-01 | 0.37068 | CXCR4, MMP8, ACTA2, JAM2, MMP10, ACTG2 (includes EG:72)                     |
| N-Glycan Biosynthesis                                           | 4.19E-01 | 0.38107 | MAN1C1, ARSG                                                                |
| 14-3-3-mediated Signaling                                       | 4.1E-01  | 0.38905 | FOXO1, CDK6, PLCL2, MAP3K5 (includes EG:4217), CDC2                         |
| Apoptosis Signaling                                             | 3.96E-01 | 0.40179 | CAPN2, MAP3K5 (includes EG:4217), CDC2                                      |
| IGF-1 Signaling                                                 | 3.88E-01 | 0.40926 | IGFBP4, NOV, FOXO1                                                          |
| PTEN Signaling                                                  | 3.81E-01 | 0.41591 | FOXO1, CCND1, BCL2L1                                                        |
| Wnt/ $\beta$ -catenin Signaling                                 | 3.76E-01 | 0.42073 | TGFB2, CCND1, PPP2R1B, LRP1, FZD7                                           |
| SAPK/JNK Signaling                                              | 3.66E-01 | 0.43053 | GADD45A, DUSP4, MAP3K5 (includes EG:4217)                                   |
| Pantothenate and CoA Biosynthesis                               | 3.6E-01  | 0.43652 | DPYSL3                                                                      |
| Glutamate Receptor Signaling                                    | 3.59E-01 | 0.43752 | GRIA1, SLC38A1                                                              |
| Butanoate Metabolism                                            | 3.41E-01 | 0.45604 | ACAT2, NLGN1                                                                |
| Glycosphingolipid Biosynthesis - Ganglioseries                  | 3.31E-01 | 0.46666 | ST3GAL5                                                                     |
| Glycosphingolipid Biosynthesis - Globoseries                    | 3.31E-01 | 0.46666 | B3GALNT1                                                                    |
| Death Receptor Signaling                                        | 3.24E-01 | 0.47424 | TNFRSF10B, MAP3K5 (includes EG:4217)                                        |
| Tyrosine Metabolism                                             | 3.24E-01 | 0.47424 | SMOX, AOX1                                                                  |
| Propanoate Metabolism                                           | 3.16E-01 | 0.48306 | ACAT2, DHCR24                                                               |
| IL-10 Signaling                                                 | 3.08E-01 | 0.49204 | SOCS3, IL1R1                                                                |
| Glycosphingolipid Biosynthesis - Neolactoseries                 | 3.06E-01 | 0.49431 | ST3GAL5                                                                     |
| Eicosanoid Signaling                                            | 3.01E-01 | 0.50003 | AKR1C3, PTGS2                                                               |
| N-Glycan Degradation                                            | 2.94E-01 | 0.50816 | MAN1C1                                                                      |
| Activation of IRF by Cytosolic Pattern Recognition Receptors    | 2.93E-01 | 0.50933 | RARRES3, IFIT2                                                              |

## Supplemental Table 4

Ingenuity Canonical Pathways hESFnon-endo cAMP vs. hESFnon-endo vehicle control

|                                                |          |         |               |
|------------------------------------------------|----------|---------|---------------|
| Valine, Leucine and Isoleucine Degradation     | 2.93E-01 | 0.50933 | ACAT2, AOX1   |
| Glycosaminoglycan Degradation                  | 2.72E-01 | 0.53456 | SULF1         |
| Circadian Rhythm Signaling                     | 2.72E-01 | 0.53456 | BHLHB3        |
| Hypoxia Signaling in the Cardiovascular System | 2.66E-01 | 0.54200 | VEGFA, HIF1A  |
| PDGF Signaling                                 | 2.6E-01  | 0.54954 | CAV1, SPHK1   |
| Arginine and Proline Metabolism                | 2.41E-01 | 0.57412 | SAT1, SMOX    |
| Serotonin Receptor Signaling                   | 2.26E-01 | 0.59429 | SMOX          |
| Complement System                              | 2.26E-01 | 0.59429 | C4A           |
| Dopamine Receptor Signaling                    | 2.25E-01 | 0.59566 | SMOX, PPP2R1B |
| Antigen Presentation Pathway                   | 2.03E-01 | 0.62661 | PSMB9         |



## Supplemental Table 5

Ingenuity Canonical Pathways hESFendo cAMP vs. hESFendo vehicle control

| Pathways                                                        | -Log(P-value) | p-value | Molecules                                                           |
|-----------------------------------------------------------------|---------------|---------|---------------------------------------------------------------------|
| Cell Cycle: G2/M DNA Damage Checkpoint Regulation               | 2.44E00       | 0.00363 | CCNB1, TOP2A, BRCA1                                                 |
| LPS/L-1 Mediated Inhibition of RXR Function                     | 1.76E00       | 0.01738 | ALDH1B1, ABCG1, SMOX, FMO4, TNFRSF11B                               |
| Caveolar-mediated Endocytosis                                   | 1.63E00       | 0.02344 | FLNB, ACTA2, CAV1                                                   |
| Tight Junction Signaling                                        | 1.47E00       | 0.03388 | MYL9 (includes EG:10398), ACTA2, PPP2R1B, TNFRSF11B                 |
| Calcium Signaling                                               | 1.35E00       | 0.04467 | MYL9 (includes EG:10398), GRIA1, ACTA2, TPM2                        |
| Histidine Metabolism                                            | 1.34E00       | 0.04571 | ALDH1B1, SMOX                                                       |
| N-Glycan Biosynthesis                                           | 1.24E00       | 0.05754 | ARSG, MGAT5                                                         |
| $\beta$ -alanine Metabolism                                     | 1.19E00       | 0.06457 | ALDH1B1, DPYSL3                                                     |
| Actin Cytoskeleton Signaling                                    | 1.12E00       | 0.07586 | MYL9 (includes EG:10398), CYFIP2 (includes EG:26999), DIAPH3, ACTA2 |
| Hepatic Fibrosis / Hepatic Stellate Cell Activation             | 1.11E00       | 0.07762 | MYL9 (includes EG:10398), ACTA2, TNFRSF11B                          |
| Glycine, Serine and Threonine Metabolism                        | 1.01E00       | 0.09772 | SMOX, PLCL2                                                         |
| LXR/RXR Activation                                              | 9.91E-01      | 0.10209 | ABCG1, TNFRSF11B                                                    |
| Arginine and Proline Metabolism                                 | 9.59E-01      | 0.10990 | ALDH1B1, SMOX                                                       |
| Dopamine Receptor Signaling                                     | 9.3E-01       | 0.11749 | SMOX, PPP2R1B                                                       |
| Ceramide Signaling                                              | 9.2E-01       | 0.12023 | PPP2R1B, TNFRSF11B                                                  |
| TGF- $\beta$ Signaling                                          | 9.02E-01      | 0.12531 | BMP2, SERPINE1                                                      |
| Xenobiotic Metabolism Signaling                                 | 8.95E-01      | 0.12735 | ALDH1B1, SMOX, FMO4, PPP2R1B                                        |
| Ascorbate and Aldarate Metabolism                               | 8.5E-01       | 0.14125 | ALDH1B1                                                             |
| Regulation of Actin-based Motility by Rho                       | 8.49E-01      | 0.14158 | RHOB, ACTA2                                                         |
| Axonal Guidance Signaling                                       | 8.11E-01      | 0.15453 | EPHB6, MYL9 (includes EG:10398), CXCR4, BMP2, NRP1                  |
| Pantothenate and CoA Biosynthesis                               | 8.1E-01       | 0.15488 | DPYSL3                                                              |
| Amyotrophic Lateral Sclerosis Signaling                         | 8.01E-01      | 0.15812 | GRIA1, RNF19A                                                       |
| Fcy Receptor-mediated Phagocytosis in Macrophages and Monocytes | 7.64E-01      | 0.17219 | GAB2, ACTA2                                                         |
| Protein Ubiquitination Pathway                                  | 7.61E-01      | 0.17338 | USP31, PSMB9, BRCA1                                                 |
| Integrin Signaling                                              | 7.09E-01      | 0.19543 | RHOB, ACTA2, CAV1                                                   |
| Sonic Hedgehog Signaling                                        | 6.83E-01      | 0.20749 | CCNB1                                                               |
| PI3K/AKT Signaling                                              | 6.43E-01      | 0.22751 | GAB2, PPP2R1B                                                       |
| Serotonin Receptor Signaling                                    | 6.34E-01      | 0.23227 | SMOX                                                                |
| Phenylalanine Metabolism                                        | 6.34E-01      | 0.23227 | SMOX                                                                |
| Coagulation System                                              | 6.12E-01      | 0.24434 | SERPINE1                                                            |
| Antigen Presentation Pathway                                    | 6.01E-01      | 0.25061 | PSMB9                                                               |
| Bile Acid Biosynthesis                                          | 5.53E-01      | 0.27990 | ALDH1B1                                                             |
| Tryptophan Metabolism                                           | 5.52E-01      | 0.28054 | ALDH1B1, SMOX                                                       |
| Synaptic Long Term Depression                                   | 5.3E-01       | 0.29512 | GRIA1, PPP2R1B                                                      |
| NF- $\kappa$ B Signaling                                        | 5.13E-01      | 0.30690 | BMP2, TNFRSF11B                                                     |
| Role of BRCA1 in DNA Damage Response                            | 4.81E-01      | 0.33037 | BRCA1                                                               |
| Glutamate Receptor Signaling                                    | 4.48E-01      | 0.35645 | GRIA1                                                               |
| Butanoate Metabolism                                            | 4.35E-01      | 0.36728 | ALDH1B1                                                             |
| Sphingolipid Metabolism                                         | 4.24E-01      | 0.37670 | ARSG                                                                |
| Tyrosine Metabolism                                             | 4.24E-01      | 0.37670 | SMOX                                                                |
| Acute Phase Response Signaling                                  | 4.21E-01      | 0.37931 | SERPINE1, TNFRSF11B                                                 |
| Propanoate Metabolism                                           | 4.18E-01      | 0.38194 | ALDH1B1                                                             |
| Ephrin Receptor Signaling                                       | 4.14E-01      | 0.38548 | EPHB6, CXCR4                                                        |

## Supplemental Table 5

Ingenuity Canonical Pathways hESFendo cAMP vs. hESFendo vehicle control

|                                                     |          |         |               |
|-----------------------------------------------------|----------|---------|---------------|
| Valine, Leucine and Isoleucine Degradation          | 4.01E-01 | 0.39719 | ALDH1B1       |
| Lysine Degradation                                  | 3.91E-01 | 0.40644 | ALDH1B1       |
| PDGF Signaling                                      | 3.76E-01 | 0.42073 | CAV1          |
| Leukocyte Extravasation Signaling                   | 3.67E-01 | 0.42954 | CXCR4, ACTA2  |
| Chemokine Signaling                                 | 3.62E-01 | 0.43451 | CXCR4         |
| Nitric Oxide Signaling in the Cardiovascular System | 3.58E-01 | 0.43853 | CAV1          |
| Pyruvate Metabolism                                 | 3.53E-01 | 0.44361 | ALDH1B1       |
| BMP signaling pathway                               | 3.49E-01 | 0.44771 | BMP2          |
| Phospholipid Degradation                            | 3.32E-01 | 0.46559 | PLCL2         |
| Androgen and Estrogen Metabolism                    | 3.28E-01 | 0.46989 | ARSG          |
| VEGF Signaling                                      | 3.2E-01  | 0.47863 | ACTA2         |
| p53 Signaling                                       | 2.99E-01 | 0.50234 | BRCA1         |
| PTEN Signaling                                      | 2.99E-01 | 0.50234 | BCL2L11       |
| PPAR Signaling                                      | 2.99E-01 | 0.50234 | TNFRSF11B     |
| Glycerolipid Metabolism                             | 2.99E-01 | 0.50234 | ALDH1B1       |
| IL-6 Signaling                                      | 2.95E-01 | 0.50699 | TNFRSF11B     |
| Glycolysis/Gluconeogenesis                          | 2.76E-01 | 0.52966 | ALDH1B1       |
| Synaptic Long Term Potentiation                     | 2.47E-01 | 0.56624 | GRIA1         |
| Glucocorticoid Receptor Signaling                   | 2.33E-01 | 0.58479 | PRL, SERPINE1 |
| Glycerophospholipid Metabolism                      | 2.29E-01 | 0.59020 | PLCL2         |
| Cardiac $\beta$ -adrenergic Signaling               | 2.17E-01 | 0.60674 | PPP2R1B       |

## Supplemental Table 6

Canonical pathways uniquely activated by cAMP in hESF from women without (hESFnon-endo) and with (hESFendo) endometriosis.

| <b>Pathways unique to hESFnon-endo response to cAMP</b>      | <b>-Log(P-value)</b> | <b>p-value</b> | <b>Molecules</b>                                                            |
|--------------------------------------------------------------|----------------------|----------------|-----------------------------------------------------------------------------|
| cAMP-mediated Signaling                                      | 2.1E00               | 0.0079         | AKAP12, RGS2, PDE7B, PDE3B, DUSP1, RGS10, DUSP4, PDE8B, ADRA2C, PDE4B       |
| G-Protein Coupled Receptor Signaling                         | 1.88E00              | 0.0132         | RGS2, PDE7B, EDNRB, PDE3B, DUSP1, RGS10, EDNRA, DUSP4, PDE8B, ADRA2C, PDE4B |
| Aminosugars Metabolism                                       | 1.32E00              | 0.0479         | PDE7B, PDE3B, PDE8B, PDE4B                                                  |
| VDR/RXR Activation                                           | 1.25E00              | 0.0562         | FOXO1, GADD45A, IL1RL1, TGFB2, HES1                                         |
| Aryl Hydrocarbon Receptor Signaling                          | 1.14E00              | 0.0724         | CCNA2, NFIX, ALDH1L2, CDK6, TGFB2, CCND1, GSTO1                             |
| TR/RXR Activation                                            | 1.14E00              | 0.0724         | AKR1C3, SLC2A1, PDE3B, RCAN2, HIF1A                                         |
| Notch Signaling                                              | 1.09E00              | 0.0813         | CNTN1, MAML3, HES1                                                          |
| Endoplasmic Reticulum Stress Pathway                         | 1.08E00              | 0.0832         | ERN1 (includes EG:2081), MAP3K5 (includes EG:4217)                          |
| C21-Steroid Hormone Metabolism                               | 9.31E-01             | 0.1172         | AKR1C3, HSD11B1                                                             |
| Interferon Signaling                                         | 7.61E-01             | 0.1734         | IFIT1, IFIT3                                                                |
| Cell Cycle: G1/S Checkpoint Regulation                       | 7.35E-01             | 0.1841         | CDK6, TGFB2, CCND1                                                          |
| Lysine Biosynthesis                                          | 6.62E-01             | 0.2178         | AASS                                                                        |
| Purine Metabolism                                            | 6.33E-01             | 0.2328         | AK5, ATP6V0B, IMPDH2, PDE7B, PDE3B, NP, RRM2, PDE8B, PDE4B, AOX1            |
| p38 MAPK Signaling                                           | 6.18E-01             | 0.2410         | DUSP1, TGFB2, IL1R1, MAP3K5 (includes EG:4217)                              |
| Synthesis and Degradation of Ketone Bodies                   | 5.54E-01             | 0.2793         | ACAT2                                                                       |
| Aminoacyl-tRNA Biosynthesis                                  | 5.34E-01             | 0.2924         | WARS, IARS                                                                  |
| NRF2-mediated Oxidative Stress Response                      | 5.05E-01             | 0.3126         | SOD2, ACTA2, MAP3K5 (includes EG:4217), AOX1, ACTG2 (includes EG:72), GSTO1 |
| Valine, Leucine and Isoleucine Biosynthesis                  | 4.98E-01             | 0.3177         | IARS                                                                        |
| 14-3-3-mediated Signaling                                    | 4.1E-01              | 0.3890         | FOXO1, CDK6, PLCL2, MAP3K5 (includes EG:4217), CDC2                         |
| Apoptosis Signaling                                          | 3.96E-01             | 0.4018         | CAPN2, MAP3K5 (includes EG:4217), CDC2                                      |
| IGF-1 Signaling                                              | 3.88E-01             | 0.4093         | IGFBP4, NOV, FOXO1                                                          |
| Wnt/ $\beta$ -catenin Signaling                              | 3.76E-01             | 0.4207         | TGFB2, CCND1, PPP2R1B, LRP1, FZD7                                           |
| SAPK/JNK Signaling                                           | 3.66E-01             | 0.4305         | GADD45A, DUSP4, MAP3K5 (includes EG:4217)                                   |
| Glycosphingolipid Biosynthesis - Ganglioseries               | 3.31E-01             | 0.4667         | ST3GAL5                                                                     |
| Glycosphingolipid Biosynthesis - Globoseries                 | 3.31E-01             | 0.4667         | B3GALNT1                                                                    |
| Death Receptor Signaling                                     | 3.24E-01             | 0.4742         | TNFRSF10B, MAP3K5 (includes EG:4217)                                        |
| IL-10 Signaling                                              | 3.08E-01             | 0.4920         | SOCS3, IL1R1                                                                |
| Glycosphingolipid Biosynthesis - Neolactoseries              | 3.06E-01             | 0.4943         | ST3GAL5                                                                     |
| Eicosanoid Signaling                                         | 3.01E-01             | 0.5000         | AKR1C3, PTGS2                                                               |
| N-Glycan Degradation                                         | 2.94E-01             | 0.5082         | MAN1C1                                                                      |
| Activation of IRF by Cytosolic Pattern Recognition Receptors | 2.93E-01             | 0.5093         | RARRES3, IFIT2                                                              |
| Glycosaminoglycan Degradation                                | 2.72E-01             | 0.5346         | SULF1                                                                       |
| Circadian Rhythm Signaling                                   | 2.72E-01             | 0.5346         | BHLHB3                                                                      |
| Hypoxia Signaling in the Cardiovascular System               | 2.66E-01             | 0.5420         | VEGFA, HIF1A                                                                |
| Complement System                                            | 2.26E-01             | 0.5943         | C4A                                                                         |
|                                                              |                      |                |                                                                             |
| <b>Pathways unique to hESFendo response to cAMP</b>          | <b>-Log(P-value)</b> | <b>p-value</b> | <b>Molecules</b>                                                            |
| Histidine Metabolism                                         | 1.34E00              | 0.0457         | ALDH1B1, SMOX                                                               |
| $\beta$ -alanine Metabolism                                  | 1.19E00              | 0.0646         | ALDH1B1, DPYSL3                                                             |
| Xenobiotic Metabolism Signaling                              | 8.95E-01             | 0.1274         | ALDH1B1, SMOX, FMO4, PPP2R1B                                                |
| Ascorbate and Aldarate Metabolism                            | 8.5E-01              | 0.1413         | ALDH1B1                                                                     |
| Protein Ubiquitination Pathway                               | 7.61E-01             | 0.1734         | USP31, PSMB9, BRCA1                                                         |
| Bile Acid Biosynthesis                                       | 5.53E-01             | 0.2799         | ALDH1B1                                                                     |
| Synaptic Long Term Depression                                | 5.3E-01              | 0.2951         | GRIA1, PPP2R1B                                                              |

## Supplemental Table 6

Canonical pathways uniquely activated by cAMP in hESF from women without (hESFnon-endo) and with (hESFendo) endometriosis.

|                                      |          |        |                 |  |  |  |  |  |  |
|--------------------------------------|----------|--------|-----------------|--|--|--|--|--|--|
| NF-κB Signaling                      | 5.13E-01 | 0.3069 | BMP2, TNFRSF11B |  |  |  |  |  |  |
| Role of BRCA1 in DNA Damage Response | 4.81E-01 | 0.3304 | BRCA1           |  |  |  |  |  |  |
| Ephrin Receptor Signaling            | 4.14E-01 | 0.3855 | EPHB6, CXCR4    |  |  |  |  |  |  |
| PDGF Signaling                       | 3.76E-01 | 0.4207 | CAV1            |  |  |  |  |  |  |
| Chemokine Signaling                  | 3.62E-01 | 0.4345 | CXCR4           |  |  |  |  |  |  |
| Pyruvate Metabolism                  | 3.53E-01 | 0.4436 | ALDH1B1         |  |  |  |  |  |  |
| PPAR Signaling                       | 2.99E-01 | 0.5023 | TNFRSF11B       |  |  |  |  |  |  |
| Glycerolipid Metabolism              | 2.99E-01 | 0.5023 | ALDH1B1         |  |  |  |  |  |  |
| IL-6 Signaling                       | 2.95E-01 | 0.5070 | TNFRSF11B       |  |  |  |  |  |  |
| Glycolysis/Gluconeogenesis           | 2.76E-01 | 0.5297 | ALDH1B1         |  |  |  |  |  |  |
| Synaptic Long Term Potentiation      | 2.47E-01 | 0.5662 | GRIA1           |  |  |  |  |  |  |
| Glucocorticoid Receptor Signaling    | 2.33E-01 | 0.5848 | PRL, SERPINE1   |  |  |  |  |  |  |
